# Supplementary material for: EF Touch – Testbatterie zur Erfassung der exekutiven Funktionen bei 3- bis 5- Jährigen
Source: Atypon-hosted journal article supplement (doi:10.1026/0012-1924/a000314), 2023-02-14

*Elektronisches Supplement 1. Ausführliche Beschreibung der EF Touch-Aufgaben.*

Hinweis: Bei keiner Aufgabe gibt es Abbruchkriterien.

### Blasenspiel

Das Blasenspiel (Bubbles) erfasst die Reaktionszeit der Kinder, indem so schnell wie möglich auf Bilder von blauen Kreisen gedrückt werden soll, sobald diese auf dem Bildschirm erscheinen. Die Aufgabe hat 30 Items.

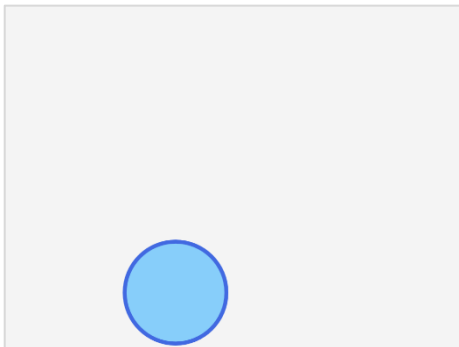

### Pfeilspiel

Das Pfeilspiel (Arrows) ist eine Aufgabe zur Überprüfung der inhibitorischen Kontrolle und ist an einer von Gerardi-Caulton (2000) entwickelte Aufgabe adaptiert worden. Zwei Kreise erscheinen am linken und rechten Rand des Touchscreen-Monitors, sowie ein Pfeil, welcher in jedem Durchgang an verschiedenen Orten dargeboten (links, Mitte, rechts) wird. Die Kinder sollen den Kreis auf der Seite antippen, in die der Pfeil zeigt. Dabei werden kongruente Trials (Pfeil befindet sich auf der gleichen Seite wie der Kreis) und inkongruente Trials (Pfeil befindet sich auf der anderen Seite als der Kreis) verglichen. Kongruente Aufgaben stellen hierbei die dominante Antwort der Kinder dar, bei den inkongruenten Aufgaben muss diese unterdrückt werden. Die Aufgabe hat 36 Items.

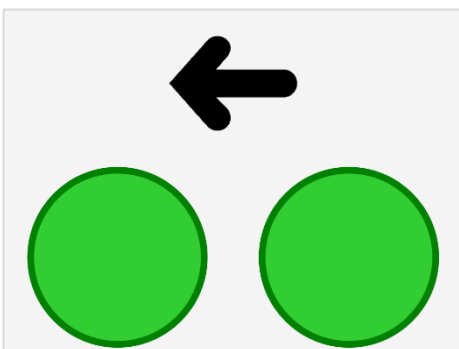

## Tierspiel

Diese Aufgabe (Pig) misst die Inhibition der motorischen Kontrolle und ist eine Standard Go/No Go-Aufgabe (Durston, Thomas, Yang, Uluk, Zimmermann & Casey, 2002). Ein grüner Kreis wird auf dem Bildschirm präsentiert und soll jedes Mal berührt werden, wenn ein Tier erscheint („Go“-Antwort), außer wenn es sich bei dem Tier um ein Schwein handelt („No-Go“-Antwort). Die No-Go-Antworten variieren in der Schwierigkeit, je nachdem, wie viele Go-Antworten ihnen vorausgegangen sind. Insgesamt umfasst die Aufgabe 40 Items.

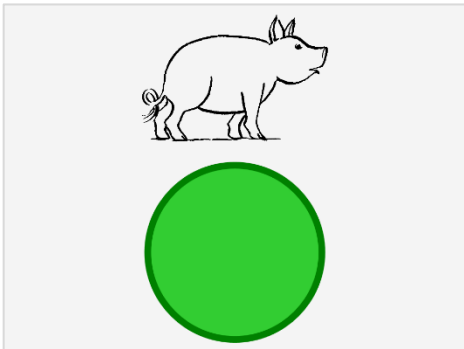

## Geräuschspiel

Diese Aufgabe (Silly Sound Game) misst die inhibitorische Kontrolle und ist eine einfache Stroop-ähnliche Aufgabe, bei der das Kind eine klar gelernte Reaktion überwinden muss (abgeleitet von Gerstadt, Hong & Diamonds (1994) Day-Night Aufgabe). Dafür werden nebeneinander Bilder einer Katze und eines Hundes präsentiert. Bei jeder Darbietung wird entweder ein Hundebellen oder ein Katzen-Miau-Ton abgespielt. Das Bild der Katze soll berührt werden, wenn das Hundebellen, und das Bild des Hundes, wenn die Katze zu hören ist. Insgesamt werden 17 Items präsentiert.

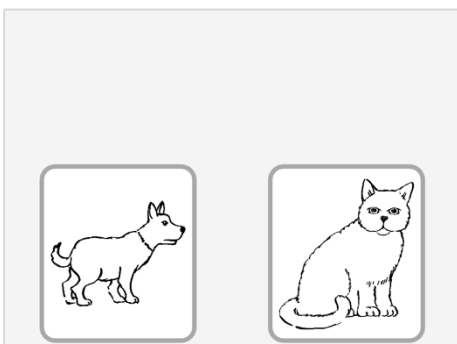

## Häuserspiel

Diese Aufgabe (Houses) misst das Arbeitsgedächtnis und basiert auf der Arbeit von Kane und Engle (2003). Es werden Bilder von Häusern präsentiert, in denen sich je ein Tier und eine Farbe befinden. Diese sollen im ersten Schritt benannt werden. Nach einer kurzen Verzögerung werden die Häuser ohne Inhalt erneut präsentiert, eine der beiden Informationen soll nun abgerufen werden. Für diese Leistung müssen zwei Informationen gleichzeitig im Gedächtnis behalten, jedoch nur eine aktiviert und die Informationen der anderen ignoriert werden. Die Schwierigkeit der Aufgabe nimmt sowohl mit der steigenden Anzahl der Häuser als auch durch die nicht mehr separate Präsentation der Farbe (das Tier „besitzt“ stattdessen die Farbe) zu. Die Aufgabe beinhaltet 18 Items.

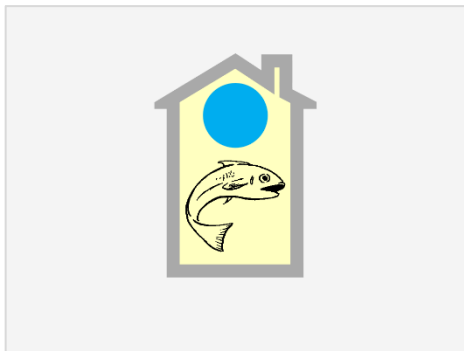

## Bauernhofspiel

Diese Aufgabe (Farmer) misst das visuell-räumliche Arbeitsgedächtnis und basiert auf einer Aufgabe, die von Nutely und Kollegen (2010) entwickelt wurde. Dafür werden ein Bauernhof und ein 4x4-Raster aus Quadraten präsentiert. Ein Tier verlässt den Bauernhof und anhand von nacheinander hervorgehobenen Feldern wird angezeigt, welchen Weg das Tier genommen hat. Das Kind wird danach angeleitet zu zeigen, in welcher exakten Reihenfolge das Tier über die Felder gelaufen ist. Die Items werden schwieriger durch die steigende Anzahl der Felder, die ein Tier läuft. Die Aufgabe umfasst 36 Items.

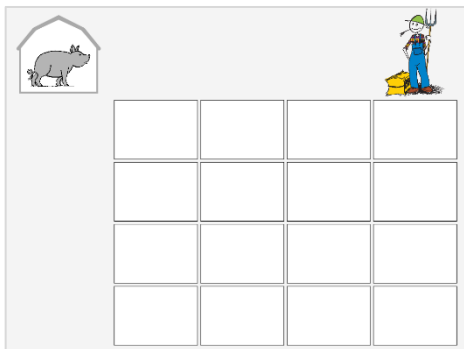

## Bilderkarussell

Diese Aufgabe (Pick the Picture) misst das Arbeitsgedächtnis und wurde adaptiert aus einer Aufgabe, bei der eigene Entscheidungen bei der Wahl von Objekten eine Rolle spielen (Cragg & Nation, 2007; Petrides & Milner, 1982). Hierfür werden mehrere Bilder nebeneinander präsentiert. Die Aufgabe besteht darin, auf jedes Bild einmal zu tippen, ohne ein Bild doppelt auszuwählen. Dieselben Bilder werden wiederholt präsentiert, bis das Kind die Möglichkeit hatte, auf jedes Bild einmal zu zeigen (z. B. 4 Bilder werden viermal präsentiert). Das Kind darf entscheiden auf welches Bild es wann zeigt, muss jedoch aufpassen, da die Bilder ihre Anordnung wechseln. Die Anzahl der nebeneinander präsentierten Bilder steigt im Verlauf der Aufgabe an (2, 3, 4, 6). Die Aufgabe umfasst 32 Items.

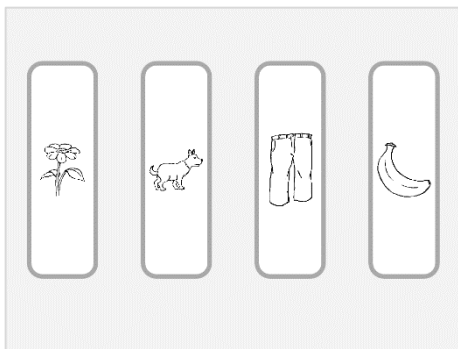

## Gemeinsamkeitenspiel

Diese Aufgabe (Something is the same) misst die Fähigkeit der Aufmerksamkeitslenkung und erfordert von den Kindern flexibles Denken. Sie wurde adaptiert aus der „Flexible Item Selection Task“, die von Jaques und Zelazo (2001) entwickelt wurde. Zu Beginn jeder Aufgabe werden zwei Bilder präsentiert, welche auf einer einzigen Dimension (Farbe, Aussehen oder Größe) identisch sind. Die Gemeinsamkeit der Bilder wird explizit benannt. Dann wird ein drittes Bild gezeigt und das Kind wird aufgefordert, das Originalbild anzutippen, welches eine Gemeinsamkeit mit dem neuen Bild teilt. In den letzten 10 Items werden drei Bilder gleichzeitig präsentiert, die zwei unterschiedliche Gemeinsamkeiten teilen. Das Kind wird aufgefordert, beide Gemeinsamkeiten durch Antippen der Bilder zu identifizieren, die Gemeinsamkeiten teilen. Die Aufgabe umfasst 30 Items.

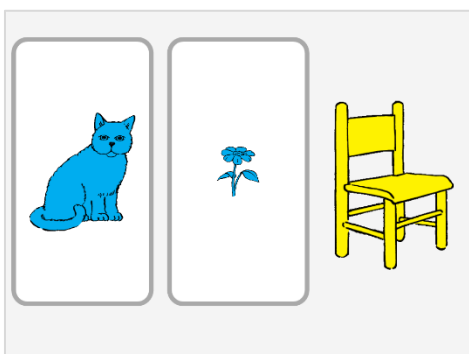

Supplement: 0012-1924_a000314_esm1.pdf [file 0012-1924_a000314_esm1.pdf]
