# Supplementary material for: EF Touch – Testbatterie zur Erfassung der exekutiven Funktionen bei 3- bis 5- Jährigen
Source: Atypon-hosted journal article supplement (doi:10.1026/0012-1924/a000314), 2023-02-14
Supplement: 0012-1924_a000314_esm3.pdf [file 0012-1924_a000314_esm3.pdf]

*Elektronisches Supplement 3. Tabelle E1. Gründe für den Ausschluss von Daten.*

---

| Aufgabe        | Anzahl Kinder | Grund für den Ausschluss                                                                                                                               |
|----------------|---------------|--------------------------------------------------------------------------------------------------------------------------------------------------------|
| Blasenspiel    | 2             | Feueralarm, mehr als 3 IQA zum 3. Quartil ( $n = 1$ )<br>Schüchternheit, am Anfang keine Tasten gedrückt, mehr als 1.5 IQA zum 3. Quartil ( $n = 1$ )  |
| Geräuschspiel  | 1             | Kind auffällig langsam, Aufgaben nicht adäquat bearbeitet, mehr als 3 IQA zum 3. Quartil                                                               |
| Häuserspiel    | 1             | Spiel durch Erzieherin unterbrochen, zusätzlich 30 Sekunden pausiert aufgrund von Problemen mit den Farben und Tieren, mehr als 1.5 IQA zum 3. Quartil |
| Bauernhofspiel | 1             | wiederholte Pausen aufgrund von mehrmaligem Versorgen einer kleinen Wunde, mehr als 3 IQA zum 3. Quartil                                               |

---

*Anmerkungen:* Der Ausschluss wurde anhand der Bearbeitungsdauer der Aufgaben und den Einschätzungen der Testleiter festgelegt.  
IQA = Interquartilsabstände.
