# Supplementary material for: EF Touch – Testbatterie zur Erfassung der exekutiven Funktionen bei 3- bis 5- Jährigen
Source: Atypon-hosted journal article supplement (doi:10.1026/0012-1924/a000314), 2023-02-14
Supplement: 0012-1924_a000314_esm4.pdf [file 0012-1924_a000314_esm4.pdf]

*Elektronisches Supplement 4. Tabelle E2. Zusammenfassung der Aufgabenleistung je Untertest.*

| Aufgabe                   | % beendet |      |      |      | % Abbrüche<br>während der Aufgabe |      |      |      | % Abbrüche<br>während des Trainings |      |      |      | % Aufgabe<br>nicht bearbeitet |      |      |      | % Kinder,<br>alle Items<br>inkorrekt | % Kinder, alle Items<br>korrekt |      |      |      |
|---------------------------|-----------|------|------|------|-----------------------------------|------|------|------|-------------------------------------|------|------|------|-------------------------------|------|------|------|--------------------------------------|---------------------------------|------|------|------|
|                           | alle      | 3 J. | 4 J. | 5 J. | alle                              | 3 J. | 4 J. | 5 J. | alle                                | 3 J. | 4 J. | 5 J. | alle                          | 3 J. | 4 J. | 5 J. | alle                                 | alle                            | 3 J. | 4 J. | 5 J. |
| Blasenspiel               | 98.9      | 96.7 | 100  | 100  | 1.1                               | 3.3  | 0    | 0    | 0                                   | 0    | 0    | 0    | 0                             | 0    | 0    | 0    | 0                                    | 82.2                            | 73.3 | 80.6 | 95.8 |
| Pfeilspiel                | 92.2      | 80.0 | 97.2 | 200  | 4.4                               | 10.0 | 2.8  | 0    | 0                                   | 0    | 0    | 0    | 3.3                           | 10.0 | 0    | 0    | 0                                    | 3.3                             | 0    | 5.6  | 4.2  |
| Tierspiel                 | 93.3      | 80.0 | 100  | 200  | 2.2                               | 6.7  | 0    | 0    | 4.4                                 | 13.3 | 0    | 0    | 0                             | 0    | 0    | 0    | 0                                    | 15.6                            | 10   | 16.7 | 20.8 |
| Geräuschspiel             | 90.0      | 80.0 | 94.4 | 95.8 | 1.1                               | 3.3  | 0    | 0    | 6.7                                 | 13.3 | 5.6  | 0    | 2.2                           | 3.3  | 0    | 4.2  | 0                                    | 7.8                             | 0    | 2.8  | 25   |
| Häuserspiel               | 70.0      | 36.7 | 80.6 | 95.8 | 10.0                              | 16.7 | 11.1 | 0    | 2.2                                 | 0    | 5.6  | 0    | 17.8                          | 46.7 | 2.8  | 4.2  | 0                                    | 0                               | 0    | 0    | 0    |
| Bauernhofspiel            | 73.3      | -    | 58.3 | 95.8 | 5.0                               | -    | 8.3  | 0    | 20                                  | -    | 30.6 | 4.2  | 1.7                           | -    | 2.8  | 0    | 0                                    | 0                               | -    | 0    | 0    |
| Bilderkarussell           | 76.7      | 36.7 | 94.4 | 100  | 8.9                               | 20.0 | 5.6  | 0    | 2.2                                 | 6.7  | 0    | 0    | 12.2                          | 36.7 | 0    | 0    | 0                                    | 0                               | 0    | 0    | 0    |
| Gemeinsam-<br>keitenspiel | 77.8      | 86.7 | 91.7 | 100  | 11.1                              | 26.7 | 5.6  | 0    | 5.6                                 | 16.7 | 0    | 0    | 5.6                           | 13.3 | 2.8  | 0    | 0                                    | 0                               | 0    | 0    | 0    |

*Anmerkungen:* Das Bauernhofspiel wurde von den Dreijährigen ( $n = 30$ ) nicht bearbeitet.
