# Supplementary material for: EF Touch – Testbatterie zur Erfassung der exekutiven Funktionen bei 3- bis 5- Jährigen
Source: Atypon-hosted journal article supplement (doi:10.1026/0012-1924/a000314), 2023-02-14
Supplement: 0012-1924_a000314_esm5.pdf [file 0012-1924_a000314_esm5.pdf]

Elektronisches Supplement 5. Tabelle E3. Anzahl korrekt beantworteter Items pro Aufgabe.

| Aufgaben             | Items | Gesamtstichprobe |          |           |              | 3-Jährige |          |           |              | 4-Jährige |          |           |              | 5-Jährige |          |           |              |
|----------------------|-------|------------------|----------|-----------|--------------|-----------|----------|-----------|--------------|-----------|----------|-----------|--------------|-----------|----------|-----------|--------------|
|                      |       | <i>n</i>         | <i>M</i> | <i>SD</i> | Min /<br>Max | <i>n</i>  | <i>M</i> | <i>SD</i> | Min /<br>Max | <i>n</i>  | <i>M</i> | <i>SD</i> | Min /<br>Max | <i>n</i>  | <i>M</i> | <i>SD</i> | Min /<br>Max |
| Blasenspiel          | 45    | 88               | 44.36    | 2.53      | 25/45        | 29        | 43.62    | 4.16      | 25/45        | 35        | 44.57    | 1.17      | 39/45        | 24        | 44.96    | .20       | 44/45        |
| Pfeilspiel           |       |                  |          |           |              |           |          |           |              |           |          |           |              |           |          |           |              |
| gesamt               | 36    | 87               | 22.90    | 8.12      | 0/36         | 27        | 18.15    | 7.15      | 1/29         | 36        | 23.92    | 7.71      | 0/36         | 24        | 26.71    | 7.43      | 11/36        |
| kongruente Items     | 19    | 87               | 13.86    | 3.90      | 0/19         | 27        | 12.22    | 3.91      | 1/18         | 36        | 13.67    | 4.06      | 0/19         | 24        | 16.00    | 2.54      | 10/19        |
| inkongruente Items   | 17    | 85               | 9.25     | 5.31      | 0/17         | 26        | 6.15     | 4.16      | 0/13         | 35        | 10.54    | 4.70      | 1/17         | 24        | 10.71    | 6.00      | 0/17         |
| Tierspiel            |       |                  |          |           |              |           |          |           |              |           |          |           |              |           |          |           |              |
| gesamt               | 40    | 86               | 35.06    | 5.22      | 7/40         | 26        | 33.19    | 6.82      | 7/40         | 36        | 34.58    | 4.72      | 24/40        | 24        | 37.79    | 2.02      | 32/40        |
| Go-Items             | 32    | 86               | 28.81    | 3.93      | 5/32         | 26        | 27.07    | 5.66      | 5/32         | 36        | 28.72    | 2.87      | 21/32        | 24        | 30.83    | 1.43      | 28/32        |
| No-Go-Items          | 8     | 86               | 6.24     | 2.00      | 0/8          | 26        | 6.12     | 1.84      | 2/8          | 36        | 5.86     | 2.47      | 0/8          | 24        | 6.96     | 1.00      | 4/8          |
| Geräuschspiel        | 17    | 81               | 10.43    | 4.73      | 1/17         | 25        | 7.36     | 3.58      | 1/15         | 33        | 10.39    | 4.89      | 1/17         | 23        | 13.82    | 3.16      | 3/17         |
| Häuserspiel          | 18    | 72               | 10.08    | 3.79      | 2/17         | 16        | 7.38     | 3.26      | 2/14         | 33        | 10.12    | 3.90      | 2/16         | 23        | 11.91    | 2.86      | 4/17         |
| Bauernhofspiel       | 36    | 46               | 13.63    | 7.59      | 0/33         | -         | -        | -         | -            | 23        | 10.13    | 6.30      | 0/27         | 23        | 17.13    | 7.24      | 5/33         |
| Bilderkarussell      | 32    | 77               | 22.22    | 5.47      | 2/30         | 17        | 16.65    | 7.00      | 2/24         | 36        | 23.19    | 4.22      | 9/30         | 24        | 24.71    | 2.58      | 17/28        |
| Gemeinsamkeitenspiel |       |                  |          |           |              |           |          |           |              |           |          |           |              |           |          |           |              |
| gesamt               | 30    | 80               | 20.05    | 7.39      | 0/29         | 21        | 14.47    | 8.00      | 0/26         | 35        | 20.43    | 6.53      | 2/29         | 24        | 24.38    | 4.56      | 9/29         |
| Teil1                | 20    | 80               | 13.89    | 5.01      | 0/20         | 21        | 10.67    | 5.21      | 0/18         | 35        | 13.77    | 4.62      | 2/20         | 24        | 16.88    | 3.52      | 7/20         |
| Teil2                | 10    | 70               | 7.04     | 1.92      | 0/9          | 13        | 6.15     | 2.08      | 0/8          | 33        | 7.06     | 1.94      | 1/9          | 24        | 7.50     | 1.72      | 2/9          |

Anmerkungen: Items mit Reaktionszeiten < 200 ms und Ausreißer wurden aus den Analysen entfernt.
