# Supplementary material for: EF Touch – Testbatterie zur Erfassung der exekutiven Funktionen bei 3- bis 5- Jährigen
Source: Atypon-hosted journal article supplement (doi:10.1026/0012-1924/a000314), 2023-02-14
Supplement: 0012-1924_a000314_esm7.pdf [file 0012-1924_a000314_esm7.pdf]

Elektronisches Supplement 7. Tabelle E5. Interkorrelationen der EF Touch-Aufgaben.

| Aufgabe                 | 1.      | 2.     | 3.     | 4.     | 5.     | 6.     | 7.     | 8.     | 8.a    |
|-------------------------|---------|--------|--------|--------|--------|--------|--------|--------|--------|
| 1. Blasenspiel          | 1       |        |        |        |        |        |        |        |        |
| 2. Pfeilspiel           | -.307*  | 1      |        |        |        |        |        |        |        |
| 3. Tierspiel            | -.219** | .472** | 1      |        |        |        |        |        |        |
| 4. Geräuschspiel        | -.407** | .470** | .505** | 1      |        |        |        |        |        |
| 5. Häuserspiel          | -.254*  | .410** | .336** | .331** | 1      |        |        |        |        |
| 6. Bauernhofspiel       | -.627** | .417** | .507** | .397** | .391*  | 1      |        |        |        |
| 7. Bilderkarussell      | -.274*  | .312** | .377** | .440** | .392*  | .157   | 1      |        |        |
| 8. Gemeinsamkeitenspiel | -.454** | .446** | .596** | .424** | .335** | .513** | .312** | 1      |        |
| 8.a Teil1               | -.442** | .417** | .531** | .360** | .364** | .514** | .209   | .958** |        |
| 8.b Teil 2              | -.142   | .221   | .413** | .306*  | .141   | .369*  | .210   | .707** | .402** |

Anmerkungen: Die abhängige Variable beim Blasenspiel ist die Reaktionszeit, die der übrigen Aufgaben die Antwortgenauigkeit. Items mit Reaktionszeiten < 200 ms und Ausreißer wurden aus den Analysen entfernt. \*  $p < .050$ , \*\*  $p < .010$ .
