# Supplementary material for: EF Touch – Testbatterie zur Erfassung der exekutiven Funktionen bei 3- bis 5- Jährigen
Source: Atypon-hosted journal article supplement (doi:10.1026/0012-1924/a000314), 2023-02-14
Supplement: 0012-1924_a000314_esm8.pdf [file 0012-1924_a000314_esm8.pdf]

Elektronisches Supplement 8. Abbildung E1. Ergebnisse der CFA für eine einfaktorische Struktur der Exekutiven Funktionen.

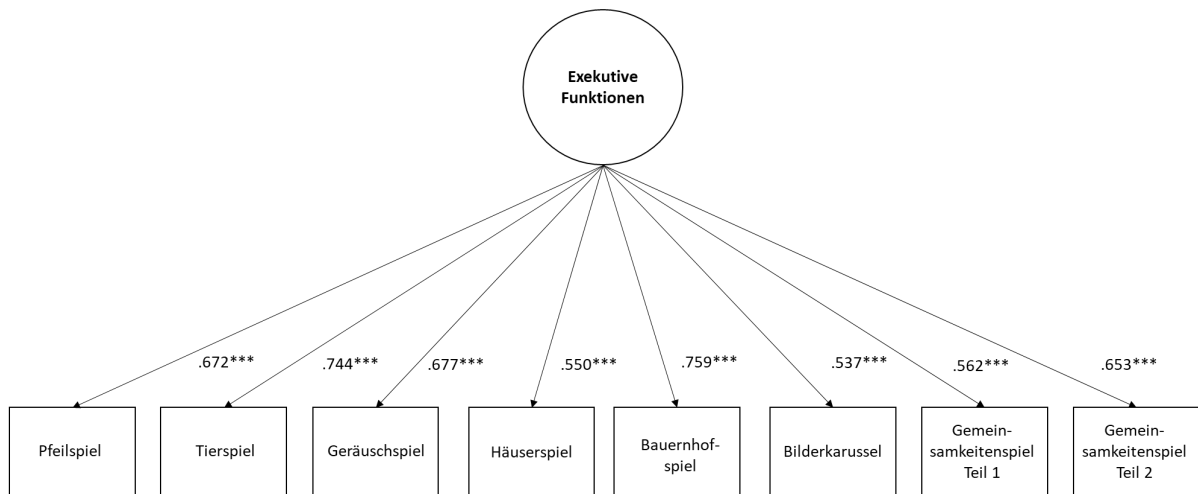

Anmerkungen: Faktorladungen sind standardisiert angegeben. \*  $p < .050$ , \*\*  $p < .010$ , \*\*\*  $p < .001$ .
