# Supplementary material for: EF Touch – Testbatterie zur Erfassung der exekutiven Funktionen bei 3- bis 5- Jährigen
Source: Atypon-hosted journal article supplement (doi:10.1026/0012-1924/a000314), 2023-02-14
Supplement: 0012-1924_a000314_esm10.pdf [file 0012-1924_a000314_esm10.pdf]

*Elektronisches Supplement 10. Tabelle E6. Korrelationen der Skalen des BRIEF-P mit den Aufgaben der EF Touch.*

| Aufgabe              | BRIEF-P<br>GEF | BRIEF-P<br>IN | BRIEF-P<br>AG | BRIEF-P<br>AW | BRIEF-P<br>EK | BRIEF-P<br>PO | BRIEF-P<br>PISK | BRIEF-P<br>FLE | BRIEF-P<br>MKE |
|----------------------|----------------|---------------|---------------|---------------|---------------|---------------|-----------------|----------------|----------------|
| EF Touch Gesamtskala | -.427**        | -.355**       | -.524**       | -.215         | -.179         | -.344**       | -.304*          | -.247*         | -.474**        |
| Blasenspiel          | .075           | .073          | .103          | -.005         | .035          | .071          | .062            | .021           | .095           |
| Pfeilspiel           | -.261*         | -.270*        | -.407**       | -.199         | .078          | -.192         | -.119           | -.068          | -.328**        |
| Tierspiel            | -.345*         | -.347*        | -.430**       | -.091         | -.171         | -.250*        | -.295*          | -.168          | -.371**        |
| Geräuschspiel        | -.255*         | -.202         | -.281*        | -.060         | -.198         | -.236         | -.219           | -.164          | -.280*         |
| Häuserspiel          | -.252*         | -.131         | -.373**       | -.159         | -.133         | -.190         | -.145           | -.180          | -.304*         |
| Bauernhofspiel       | -.491**        | -.415**       | -.461**       | -.306*        | -.357*        | -.368*        | -.424**         | -.423**        | -.447**        |
| Bilderkarussell      | -.156          | -.115         | -.132         | -.059         | -.076         | -.215         | -.108           | -.087          | -.187          |
| Gemeinsamkeitenspiel | -.404**        | -.298*        | -.420**       | -.288*        | -.249*        | -.277*        | -.307*          | -.337**        | -.380**        |
| Teil 1               | -.373**        | -.275*        | -.340**       | -.223         | -.276*        | -.292**       | -.310**         | -.310**        | -.343**        |
| Teil 2               | -.215          | -.115         | -.220         | -.215         | -.160         | -.110         | -.152           | -.234          | -.181          |

*Anmerkungen:* Die abhängige Variable beim Blasenspiel ist die Reaktionszeit, die der übrigen Aufgaben die Antwortgenauigkeit. Items mit Reaktionszeiten < 200 ms und Ausreißer wurden aus den Analysen entfernt. BRIEF-P GEF = Gesamtwert Exekutive Funktionen, BRIEF-P IN = Inhibition, BRIEF-P AG = Arbeitsgedächtnis, BRIEF-P AW = Aufmerksamkeitswechsel, BRIEF-P EK = Emotionale Kontrolle, BRIEF-P PO = Planen/Organisation, BRIEF-P ISK = Inhibitorische Selbstkontrolle, BRIEF-P FLE = Flexibilität, BRIEF-P MKE = Metakognitive Entwicklung. \*  $p < .050$ , \*\*  $p < .010$ .
