# Supplementary material for: EF Touch – Testbatterie zur Erfassung der exekutiven Funktionen bei 3- bis 5- Jährigen
Source: Atypon-hosted journal article supplement (doi:10.1026/0012-1924/a000314), 2023-02-14
Supplement: 0012-1924_a000314_esm11.pdf [file 0012-1924_a000314_esm11.pdf]

*Elektronisches Supplement 11.* Tabelle E7. Varianzanalysen mit den Faktoren Geschlecht (männlich vs. weiblich) und Alter (3 vs. 4 vs. 5 Jahre) und Leistung in den Aufgaben als abhängige Variablen.

| Aufgabe              | Geschlecht (männlich vs. weiblich) |          |          | Alter (3 vs. 4 vs. 5 Jahre) |          |          | Geschlecht × Alter |          |          |
|----------------------|------------------------------------|----------|----------|-----------------------------|----------|----------|--------------------|----------|----------|
|                      | <i>F</i>                           | <i>p</i> | $\eta^2$ | <i>F</i>                    | <i>p</i> | $\eta^2$ | <i>F</i>           | <i>p</i> | $\eta^2$ |
| Blasenspiel          | 0.18                               | .671     | .00      | 22.97                       | < .001   | .43      | 1.75               | .181     | .05      |
| Pfeilspiel           | 2.16                               | .146     | .03      | 4.07                        | .022     | .11      | 0.70               | .502     | .02      |
| Tierspiel            | 5.56                               | .021     | .08      | 9.88                        | < .001   | .24      | 3.14               | .050     | .09      |
| Geräuschspiel        | 0.15                               | .702     | .00      | 10.15                       | < .001   | .25      | 2.45               | .095     | .08      |
| Häuserspiel          | 0.09                               | .771     | .00      | 5.38                        | .007     | .16      | 0.52               | .597     | .02      |
| Bauernhofspiel       | 2.00                               | .165     | .05      | 13.25                       | .001     | .25      | 4.66               | .037     | .10      |
| Bilderkarussell      | 1.17                               | .283     | .02      | 7.18                        | .002     | .19      | 0.41               | .666     | .01      |
| Gemeinsamkeitenspiel |                                    |          |          |                             |          |          |                    |          |          |
| Teil 1               | 6.11                               | .016     | .09      | 6.50                        | .003     | .17      | 0.76               | .474     | .02      |
| Teil 2               | 0.02                               | .886     | .00      | 1.82                        | .171     | .05      | 2.86               | .065     | .08      |

*Anmerkungen:* Die abhängige Variable beim Blasenspiel ist die Reaktionszeit, die der übrigen Aufgaben die Antwortgenauigkeit. Items mit Reaktionszeiten < 200 ms und Ausreißer wurden aus den Analysen entfernt.
