# Supplementary material for: EF Touch – Testbatterie zur Erfassung der exekutiven Funktionen bei 3- bis 5- Jährigen
Source: Atypon-hosted journal article supplement (doi:10.1026/0012-1924/a000314), 2023-02-14
Supplement: 0012-1924_a000314_esm12.pdf [file 0012-1924_a000314_esm12.pdf]

*Elektronisches Supplement 12.* Tabelle E8. Signifikanzen der Post-hoc-Tests mit dem Faktor Alter (3 vs. 4 vs. 5 Jahre) und Leistung in den Aufgaben als abhängige Variablen.

| Aufgabe              | 3 vs. 4 | 4 vs. 5 | 3 vs. 5 |
|----------------------|---------|---------|---------|
| Blasenspiel          | < .001  | .002    | < .001  |
| Pfeilspiel           | .010    | .478    | < .001  |
| Tierspiel            | .691    | .024    | .001    |
| Geräuschspiel        | .016    | .007    | < .001  |
| Häuserspiel          | .037    | .191    | .001    |
| Bauernhofspiel       | -       | < .001  | -       |
| Bilderkarussell      | < .001  | .671    | < .001  |
| Gemeinsamkeitenspiel | .004    | .071    | < .001  |
| Teil 1               | .040    | .030    | < .001  |
| Teil 2               | .410    | 1.00    | .112    |

*Anmerkungen:* Die abhängige Variable beim Blasenspiel ist die Reaktionszeit, die der übrigen Aufgaben die Antwortgenauigkeit. Items mit Reaktionszeiten < 200 ms und Ausreißer wurden aus den Analysen entfernt. Für die Analysen wurde der Bonferroni-Test verwendet.
