# Supplementary material for: EF Touch – Testbatterie zur Erfassung der exekutiven Funktionen bei 3- bis 5- Jährigen
Source: Atypon-hosted journal article supplement (doi:10.1026/0012-1924/a000314), 2023-02-14
Supplement: 0012-1924_a000314_esm13.pdf [file 0012-1924_a000314_esm13.pdf]

*Elektronisches Supplement 13. Tabelle E 9. Ergebnisse des Vergleichs von Kindern aus Familien, in denen nur Deutsch gesprochen wird, und Familien, in denen Deutsch und eine andere Sprache gesprochen werden (t-Test)*

| Aufgabe                 | Deutsche Sprache |           | andere Sprache |           | <i>t</i> (df) | <i>p</i> | 95 % KI |        | Cohens <i>d</i> |
|-------------------------|------------------|-----------|----------------|-----------|---------------|----------|---------|--------|-----------------|
|                         | <i>M</i>         | <i>SD</i> | <i>M</i>       | <i>SD</i> |               |          | UG      | OG     |                 |
| 1. Blasenspiel          | 1172.93          | 301.43    | 1138.48        | 257.79    | .55(86)       | .586     | -90.72  | 159.63 | 285.97          |
| 2. Pfeilspiel           | 0.67             | 0.21      | 0.58           | 0.24      | 1.92(85)      | .058     | -0.00   | 0.19   | 0.22            |
| 3. Tierspiel            | 0.89             | 0.13      | 0.85           | 0.12      | 1.37(84)      | .175     | -0.02   | 0.10   | 0.13            |
| 4. Geräuschspiel        | 0.65             | 0.26      | 0.55           | 0.31      | 1.31(46.50)   | .196     | -0.05   | 0.23   | 0.28            |
| 5. Häuserspiel          | 0.60             | 0.21      | 0.50           | 0.21      | 1.98(70)      | .051     | -0.00   | 0.20   | 0.21            |
| 6. Bauernhofspiel       | 0.41             | 0.21      | 0.31           | 0.19      | 1.75(44)      | .087     | -0.01   | 0.22   | 0.20            |
| 7. Bilderkarussell      | 0.70             | 0.20      | 0.69           | 0.12      | .27(74.82)    | .789     | -0.06   | 0.08   | 0.17            |
| 8. Gemeinsamkeitenspiel | 0.61             | 0.26      | 0.70           | 0.20      | 1.90(78)      | .062     | -0.01   | 0.21   | 0.24            |
| a. Teil1                | 0.74             | 0.23      | 0.63           | 0.26      | 1.95(78)      | .055     | -0.00   | 0.22   | 0.25            |
| b. Teil2                | 0.73             | 0.16      | 0.66           | 0.23      | 1.45(42.94)   | .155     | -0.03   | 0.17   | 0.19            |

*Anmerkungen:* Der *t*-Test des Blasenspiels wurde mit den Reaktionszeiten berechnet, die restlichen Ergebnisse mit Richtig/Falsch-Antworten. Items mit einer Reaktionszeit < 200 ms wurden entfernt sowie Ausreißer mit Anmerkungen durch den TL ausgeschlossen. KI = Konfidenzintervall. UG = untere Grenze. OG = obere Grenze.
