# Supplementary material for: EF Touch – Testbatterie zur Erfassung der exekutiven Funktionen bei 3- bis 5- Jährigen
Source: Atypon-hosted journal article supplement (doi:10.1026/0012-1924/a000314), 2023-02-14
Supplement: 0012-1924_a000314_esm14.pdf [file 0012-1924_a000314_esm14.pdf]

*Elektronisches Supplement 14. Syntaxbefehle zur Auswertung des Anteils korrekter Antworten am Beispiel der Aufgabe Pfeilspiel für die Software IBM SPSS Statistics 27, mit Ausschluss der Items < 200 ms.*

```
DO IF MISSING(Arr_1_ms).
RECODE Arr_1 (ELSE=COPY) INTO Arr_1_200ms.
ELSE IF (Arr_1_ms > 200).
RECODE Arr_1 (0 thru 99=Copy) INTO Arr_1_200ms.
END IF.
EXECUTE.
.....
```

```
DO IF MISSING(Arr_36_ms).
RECODE Arr_36 (ELSE=COPY) INTO Arr_36_200ms.
ELSE IF (Arr_36_ms > 200).
RECODE Arr_36 (0 thru 99=Copy) INTO Arr_36_200ms.
END IF.
EXECUTE.
```

```
RECODE Arr_1_200ms Arr_2_200ms Arr_3_200ms Arr_4_200ms Arr_5_200ms
Arr_6_200ms Arr_7_200ms Arr_8_200ms Arr_9_200ms Arr_10_200ms Arr_11_200ms
Arr_12_200ms Arr_12_200ms Arr_13_200ms Arr_14_200ms Arr_15_200ms Arr_16_200ms
Arr_17_200ms Arr_18_200ms Arr_19_200ms Arr_20_200ms Arr_21_200ms Arr_22_200ms
Arr_23_200ms Arr_24_200ms Arr_25_200ms Arr_26_200ms Arr_27_200ms Arr_28_200ms
Arr_29_200ms Arr_30_200ms Arr_31_200ms Arr_32_200ms Arr_33_200ms Arr_34_200ms
Arr_35_200ms Arr_36_200ms (SYSMIS = 99).
EXECUTE.
```

```
MISSING VALUES Arr_1_200ms Arr_2_200ms Arr_3_200ms Arr_4_200ms Arr_5_200ms
Arr_6_200ms Arr_7_200ms Arr_8_200ms Arr_9_200ms Arr_10_200ms Arr_11_200ms
Arr_12_200ms Arr_12_200ms Arr_13_200ms Arr_14_200ms Arr_15_200ms Arr_16_200ms
Arr_17_200ms Arr_18_200ms Arr_19_200ms Arr_20_200ms Arr_21_200ms Arr_22_200ms
Arr_23_200ms Arr_24_200ms Arr_25_200ms Arr_26_200ms Arr_27_200ms Arr_28_200ms
Arr_29_200ms Arr_30_200ms Arr_31_200ms Arr_32_200ms Arr_33_200ms Arr_34_200ms
Arr_35_200ms Arr_36_200ms (99).
EXECUTE.
```

```
COMPUTE Arr_PrpCor_200ms=(SUM.1(Arr_1_200ms, Arr_2_200ms, Arr_3_200ms,
Arr_4_200ms, Arr_5_200ms, Arr_6_200ms, Arr_7_200ms, Arr_8_200ms, Arr_9_200ms,
Arr_10_200ms, Arr_11_200ms, Arr_12_200ms, Arr_13_200ms, Arr_14_200ms,
Arr_15_200ms, Arr_16_200ms, Arr_17_200ms, Arr_18_200ms, Arr_19_200ms,
Arr_20_200ms, Arr_21_200ms, Arr_22_200ms, Arr_23_200ms, Arr_24_200ms,
Arr_25_200ms, Arr_26_200ms, Arr_27_200ms, Arr_28_200ms, Arr_29_200ms,
Arr_30_200ms, Arr_31_200ms, Arr_32_200ms, Arr_33_200ms, Arr_34_200ms,
Arr_35_200ms, Arr_36_200ms))/36.
```

```
RECODE Arr_PrpCor_200ms (SYSMIS = 99).
EXECUTE.
```

```
MISSING VALUES Arr_PrpCor_200ms (99).
EXECUTE.
```
